# Supplementary material
Source: publisher figshare collection journal article supplement (https://future-science-group.figshare.com/ndownloader/files/30820987)
Supplement: Supplementary file 1 [file 30820987]

Supplements 2

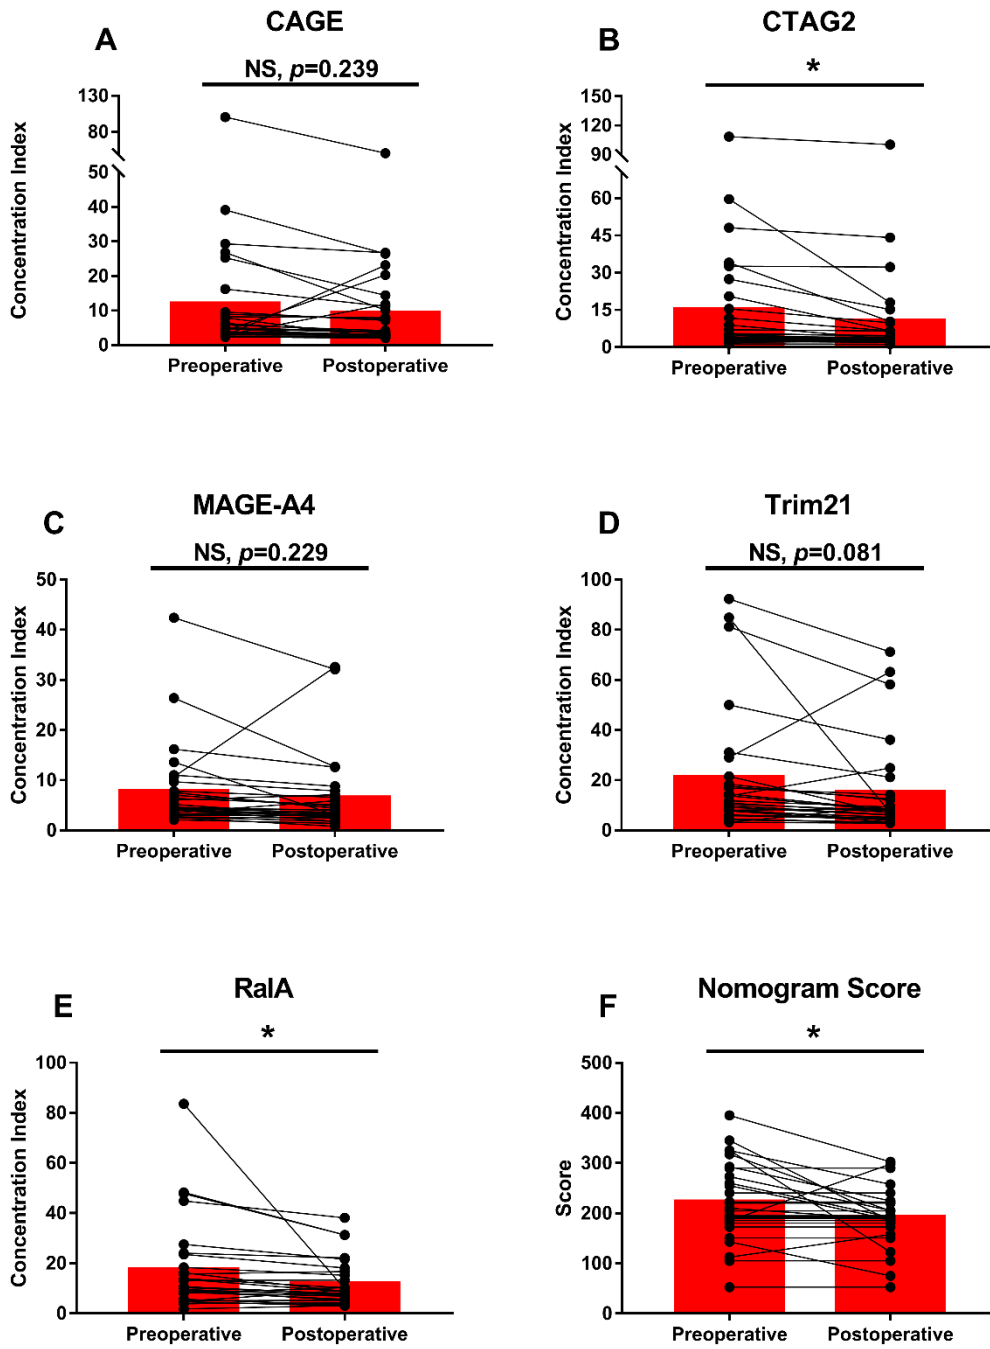

Supplement figure 2: A~E Comparison of titers and mean values of 5 kinds of autoantibodies between preoperative and postoperative groups

F Comparison of scores and mean values between the preoperative group and postoperative group
